# Supplementary material for: Dietary Supplementation with Eugenol Nanoemulsion Alleviates the Negative Effects of Experimental Coccidiosis on Broiler Chicken’s Health and Growth Performance
Source: MDPI journal article supplement (doi:10.3390/molecules28052200), 2023-02-27
Supplement: s1 [file s1]

**Supplementary Table S2.** Chemical composition of clove essential oil.

| No | Component <sup>a</sup>       | Calculated RI <sup>b</sup> | Abundance (%) <sup>c</sup> |
|----|------------------------------|----------------------------|----------------------------|
| 1  | Limonene                     | 1025                       | 0.2                        |
| 2  | 1,8-Cineole                  | 1032                       | 0.1                        |
| 3  | <i>cis</i> -Limonene oxide   | 1136                       | tr                         |
| 4  | <i>trans</i> -Limonene oxide | 1147                       | tr                         |
| 5  | Methyl salicylate            | 1190                       | 0.1                        |
| 6  | Chavicol                     | 1251                       | 0.2                        |
| 7  | <b>Eugenol</b>               | 1358                       | <b>82.2</b>                |
| 8  | $\beta$ -Caryophyllene       | 1415                       | 3.3                        |
| 9  | $\alpha$ -Humulene           | 1452                       | 1.2                        |
| 10 | <b>Eugenol acetate</b>       | 1520                       | <b>12.2</b>                |
| 11 | Caryophyllene oxide          | 1580                       | 0.2                        |
|    | Total identified (%)         |                            | 99.7                       |

<sup>a</sup> Compounds are listed in order of their elution from a HP-5MS column.

<sup>b</sup> Linear retention index (RI) on HP-5MS column, experimentally determined using homologous series of C<sub>8</sub>-C<sub>30</sub> alkanes.

<sup>c</sup> Relative percentage values are means of three determinations with a relative standard deviation (RSD%) in all cases below 10%.
