# Supplementary material for: Dietary Supplementation with Eugenol Nanoemulsion Alleviates the Negative Effects of Experimental Coccidiosis on Broiler Chicken’s Health and Growth Performance
Source: MDPI journal article supplement (doi:10.3390/molecules28052200), 2023-02-27
Supplement: s1 [file s1]

**Supplementary Table S1.** Composition of basal diet.

| <b>Ingredients</b>                  | <b>Starter (D0–10)</b> | <b>Grower (D11–24)</b> | <b>Finisher (D25–42)</b> |
|-------------------------------------|------------------------|------------------------|--------------------------|
| Corn                                | 56                     | 58.97                  | 62.8                     |
| Soybean meal                        | 38.5                   | 34.5                   | 30.37                    |
| Soybean oil                         | 1.3                    | 2.2                    | 2.9                      |
| Dicalcium Phosphate                 | 1.6                    | 1.4                    | 1.3                      |
| Calcium carbonate                   | 1.1                    | 1                      | 0.96                     |
| Methionine                          | 0.3                    | 0.28                   | 0.25                     |
| Lysine                              | 0.25                   | 0.2                    | 0.18                     |
| Threonine                           | 0.1                    | 0.6                    | 0.4                      |
| Vitamin and mineral premix          | 0.5                    | 0.5                    | 0.5                      |
| Common salt                         | 0.25                   | 0.24                   | 0.22                     |
| Sodium bicarbonate                  | 0.1                    | 0.13                   | 0.12                     |
| <b>Calculated composition</b>       |                        |                        |                          |
| Metabolizable energy (kcal/kg)      | 2850                   | 2947                   | 3047                     |
| Crude protein (%)                   | 21.8                   | 20.5                   | 18.6                     |
| Calcium (%)                         | 0.9                    | 0.82                   | 0.75                     |
| Available phosphorus (%)            | 0.45                   | 0.42                   | 0.39                     |
| Digestible methionine (%)           | 0.66                   | 0.62                   | 0.57                     |
| Digestible methionine + cystine (%) | 1.02                   | 0.97                   | 0.89                     |
| Digestible lysine (%)               | 1.38                   | 1.26                   | 1.14                     |
